# Supplementary material
Source: Springer Nature journal article supplement (https://www.springermedizin.de/resource/supplementary/13054_2010_8389_MOESM5_ESM.pdf/9731852)

**A**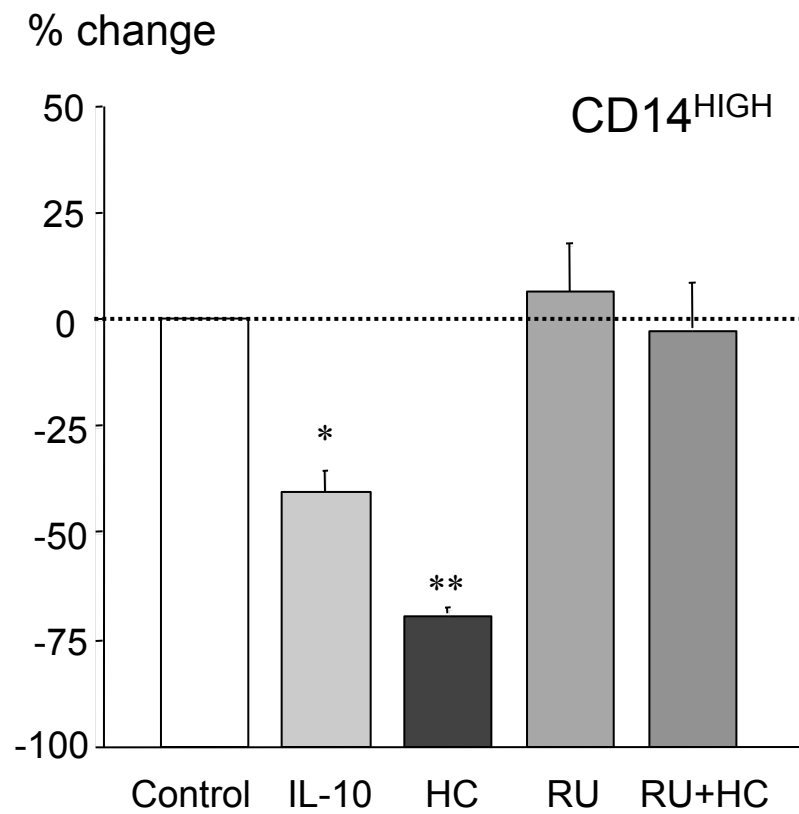**B**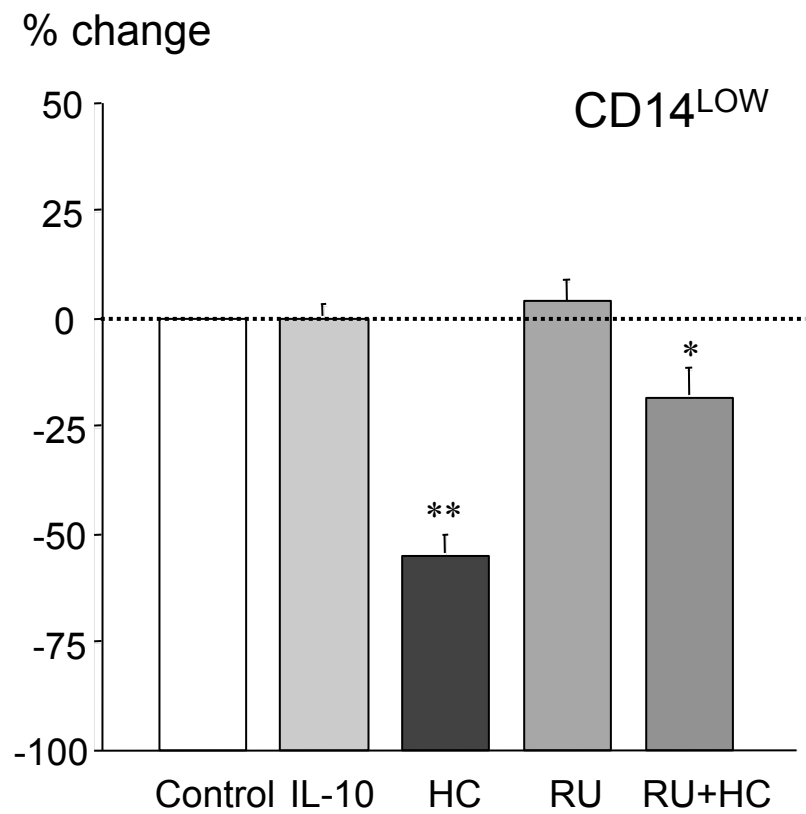

Supplement: MOESM5 [file 9731852]
